# Supplementary material for: Autophagy promotes MSC-mediated vascularization in cutaneous wound healing via regulation of VEGF secretion
Source: PubMed Central journal article supplement (PMC5833357; doi:10.1038/s41419-017-0082-8), 2018-01-19
Supplement: 41419_2017_82_MOESM1_ESM.pdf [file 41419_2017_82_MOESM1_ESM.pdf]

# **Autophagy promotes MSC-mediated vascularization in cutaneous wound healing via regulation of VEGF secretion**

An Y<sup>1,2#</sup>, Liu WJ<sup>2,3#</sup>, Xue P<sup>4#</sup>, Ma Y<sup>2</sup>, Zhang LQ<sup>2</sup>, Zhu B<sup>2,5</sup>, Qi M<sup>2</sup>,

Li LY<sup>2</sup>, Zhang YJ<sup>2</sup>, Wang QT<sup>1\*</sup>, Jin Y<sup>2\*</sup>

<sup>1</sup> State Key Laboratory of Military Stomatology & National Clinical Research Center for Oral Diseases & Shaanxi Engineering Research Center for Dental Materials and Advanced Manufacture, Department of Periodontology, School of Stomatology, The Fourth Military Medical University, Xi'an, Shaanxi 710032, China

<sup>2</sup> State Key Laboratory of Military Stomatology & National Clinical Research Center for Oral Diseases & Shaanxi International Joint Research Center for Oral Diseases, Center for Tissue Engineering, School of Stomatology, The Fourth Military Medical University, Xi'an, Shaanxi 710032, China

<sup>3</sup> Xi'an Institute of Tissue Engineering and Regenerative Medicine, Xi'an, Shaanxi 710032, China

<sup>4</sup> Institute of Stomatology, Chinese PLA General Hospital, Beijing 100853, China

<sup>5</sup> Department of Stomatology, PLA Xizang Military Region General Hospital, Lhasa, Tibet 850007, China.

# These authors contributed equally to this work.

\*Correspondence: [yanjin@fmmu.edu.cn](mailto:yanjin@fmmu.edu.cn); [yanjin@fmmu.edu.cn](mailto:yanjin@fmmu.edu.cn) (Jin Y.),

[yznmbk@fmmu.edu.cn](mailto:yznmbk@fmmu.edu.cn) (Wang QT.)

**Supplementary Figure S1** Isolation and characterization of human mesenchymal stem cells (MSCs). (a) Representative images of single-cell cloning formation from MSCs at day 10. (b) Alizarin red staining of MSCs after 4 weeks of induction in the osteogenic medium (100×). The expression of osteogenesis proteins OCN, SP7 and Runx-2 were detected by western blot. (c) Oil red staining of MSCs after 3 weeks of induction in the adipogenic medium (100×). The expression of adipogenesis proteins LPL and PPAR were detected by western blot. (d) The ultrastructural morphology of autophagosome in MSCs and the protein of Atg7, Beclin-1 and LC3I/II were detected by western blot.

**Supplementary Figure S2** Dio-labeled MSCs (red) and LC3-positive cells (green) at 48h after subcutaneous injection. The co-stained cells represented the autophagy activation of MSCs. Scale bar = 50µm.

**Supplementary Figure S3** There was no distinction between control group and si-control group. (a) The expression of proteins VEGF, Atg7, Beclin-1 and LC3I/II were detected by western blot. (b) Immunohistochemistry staining on CD31 of wound area tissues 2-week post-operative (<sup>NS</sup>P > 0.05, n=3). Scale bar = 50µm. (c, d) Images of wound size on the back of mouse and quantification of wound healing rate (%). Scale bar = 5mm.

**Supplementary Figure S4** Dio-labeled MSCs (red) were detected by immunofluorescence assay 48h after injection. Scale bar = 50 $\mu$ m.

**Supplementary Figure S5** Rapamycin had no effect on the wound healing through local application. (a) Images of wound size on the back of mouse and quantification of wound healing rate (%). Scale bar = 5mm. (b) Hematoxylin and eosin (H&E) staining of wound area tissues at 2-week post-operative. The red boxes indicate the skin wound healing. Scale bar = 2mm. (c) Immunohistochemistry staining on CD31 of wound area tissues and quantification of positive area of CD31 at 2-week post-operative (<sup>NS</sup>P > 0.05, n=3). Scale bar = 50 $\mu$ m.

**Supplementary Figure S6** VEGF was transfected by siRNA. (a) The protein of VEGF was decreased at 48 hours after transfection (n=3). (b) The gene of VEGF was decreased at 48h after transfection (<sup>NS</sup>P > 0.05, n=6).

**Supplement Table S1** Specific primer sequences used for reverse transcriptase-polymerase chain reaction analysis.
